# Supplementary material for: Excess-electron capture and energy transfer to bulk water for aqueous DNA nucleotide
Source: Royal Society of Chemistry journal article supplement (doi:10.1039/d2cp03592h), 2022-12-02
Supplement: d2cp03592h1.pdf [file d2cp03592h1.pdf]

Electronic Supplementary Information for

# Excess-electron Capture and Energy Transfer to Bulk Water for Aqueous DNA Nucleotide

Yan Zhang,<sup>a,\*</sup> Xuanning Chen,<sup>a</sup> Shuhui Yin,<sup>a</sup> Yinhua Ma,<sup>a</sup> Songqiu Yang<sup>b</sup>

<sup>a</sup>School of Science, Dalian Maritime University, Linghai Road 1, Dalian 116026, China

<sup>b</sup>State Key Laboratory of Molecular Reaction Dynamics, Dalian Institute of Chemical Physics, Chinese Academy of Science, Zhongshan Road 457, Dalian 116023, China.

**Corresponding Authors:**

\*Email: yan\_zhang@dlnu.edu.cn

Table S1. Atomic number in QM region for each snapshot.

|      | dAMP <sup>-</sup> | dGMP <sup>-</sup> | dCMP <sup>-</sup> | dTMP <sup>-</sup> |
|------|-------------------|-------------------|-------------------|-------------------|
| 1025 | 128               | 147               | 135               | 137               |
| 1050 | 125               | 144               | 138               | 140               |
| 1075 | 143               | 138               | 129               | 134               |
| 1100 | 140               | 135               | 138               | 143               |
| 1125 | 134               | 126               | 126               | 128               |
| 1150 | 140               | 135               | 123               | 143               |
| 1175 | 131               | 147               | 120               | 134               |
| 1200 | 146               | 147               | 120               | 152               |
| 1225 | 131               | 150               | 123               | 134               |
| 1250 | 134               | 135               | 129               | 131               |
| 1275 | 137               | 132               | 129               | 146               |
| 1300 | 125               | 144               | 129               | 137               |
| 1325 | 146               | 144               | 129               | 134               |
| 1350 | 125               | 126               | 126               | 149               |
| 1375 | 134               | 144               | 123               | 143               |
| 1400 | 131               | 126               | 141               | 146               |
| 1425 | 140               | 138               | 132               | 140               |
| 1450 | 134               | 147               | 132               | 143               |
| 1475 | 137               | 144               | 129               | 146               |
| 1500 | 134               | 144               | 132               | 143               |
| 1525 | 131               | 129               | 111               | 125               |
| 1550 | 134               | 132               | 138               | 152               |
| 1575 | 122               | 141               | 129               | 140               |
| 1600 | 122               | 141               | 129               | 140               |
| 1625 | 131               | 144               | 123               | 134               |
| 1650 | 143               | 144               | 138               | 134               |
| 1675 | 134               | 132               | 132               | 131               |
| 1700 | 152               | 141               | 129               | 146               |
| 1725 | 131               | 138               | 132               | 137               |
| 1750 | 125               | 132               | 120               | 137               |
| 1775 | 128               | 138               | 114               | 131               |
| 1800 | 143               | 147               | 138               | 128               |
| 1825 | 137               | 138               | 129               | 125               |
| 1850 | 140               | 147               | 150               | 128               |
| 1875 | 137               | 150               | 138               | 134               |
| 1900 | 146               | 153               | 138               | 146               |
| 1925 | 140               | 150               | 144               | 155               |
| 1950 | 140               | 135               | 129               | 122               |
| 1975 | 134               | 144               | 123               | 137               |
| 2000 | 149               | 132               | 138               | 134               |
| Ave. | 135               | 140               | 130               | 138               |

Table S2. Excess-electron distributions of pol-QM and gas-QM computations averaged over 40 snapshots in vertical electron attachment and standard errors ( $e$ ).

|                                                      | <b>dAMP<sup>-</sup> → dAMP<sup>2-</sup></b> | <b>dGMP<sup>-</sup> → dGMP<sup>2-</sup></b> | <b>dCMP<sup>-</sup> → dCMP<sup>2-</sup></b> | <b>dTMP<sup>-</sup> → dTMP<sup>2-</sup></b> |
|------------------------------------------------------|---------------------------------------------|---------------------------------------------|---------------------------------------------|---------------------------------------------|
| <b><math>Q_{\text{dRT}}(\text{gas-QM})</math></b>    | <b><math>-0.08 \pm 0.02</math></b>          | <b><math>-0.07 \pm 0.01</math></b>          | <b><math>-0.11 \pm 0.02</math></b>          | <b><math>-0.19 \pm 0.03</math></b>          |
| <b><math>Q_{\text{dRT}}(\text{pol-QM})</math></b>    | <b><math>-0.49 \pm 0.02</math></b>          | <b><math>-0.38 \pm 0.02</math></b>          | <b><math>-0.47 \pm 0.02</math></b>          | <b><math>-0.52 \pm 0.02</math></b>          |
| <b><math>Q_{\text{base}}(\text{pol-QM})</math></b>   | <b><math>-0.40 \pm 0.02</math></b>          | <b><math>-0.31 \pm 0.02</math></b>          | <b><math>-0.37 \pm 0.02</math></b>          | <b><math>-0.41 \pm 0.02</math></b>          |
| <b><math>Q_{\text{ribose}}(\text{pol-QM})</math></b> | <b><math>-0.05 \pm 0.01</math></b>          | <b><math>-0.02 \pm 0.01</math></b>          | <b><math>-0.04 \pm 0.01</math></b>          | <b><math>-0.06 \pm 0.01</math></b>          |

Table S3. Mean excess-electron distributions and standard errors in adiabatic electron attachment to aqueous dRT<sup>-</sup> and standard errors (*e*).

|                                  | <b>dAMP<sup>-</sup> → dAMP<sup>2-</sup></b> | <b>dGMP<sup>-</sup> → dGMP<sup>2-</sup></b> | <b>dCMP<sup>-</sup> → dCMP<sup>2-</sup></b> | <b>dTMP<sup>-</sup> → dTMP<sup>2-</sup></b> |
|----------------------------------|---------------------------------------------|---------------------------------------------|---------------------------------------------|---------------------------------------------|
| <b><i>Q</i><sub>dRT</sub></b>    | <b>-0.84 ± 0.04</b>                         | <b>-0.78 ± 0.06</b>                         | <b>-0.89 ± 0.04</b>                         | <b>-0.91 ± 0.04</b>                         |
| <b><i>Q</i><sub>base</sub></b>   | <b>-0.79 ± 0.04</b>                         | <b>-0.67 ± 0.06</b>                         | <b>-0.72 ± 0.04</b>                         | <b>-0.75 ± 0.04</b>                         |
| <b><i>Q</i><sub>ribose</sub></b> | <b>0.04 ± 0.04</b>                          | <b>-0.09 ± 0.05</b>                         | <b>-0.13 ± 0.04</b>                         | <b>-0.13 ± 0.04</b>                         |

Table S4. Mean energy differences (eV) of dRT<sup>2-</sup> between gas-QM and pol-QM calculations.

|                           | <b>dAMP<sup>2-</sup></b> | <b>dGMP<sup>2-</sup></b> | <b>dCMP<sup>2-</sup></b> | <b>dTMP<sup>2-</sup></b> |
|---------------------------|--------------------------|--------------------------|--------------------------|--------------------------|
| $\Delta E_{QM}^{2-}(A)_a$ | <b>37.08 ± 0.09</b>      | <b>37.67 ± 0.09</b>      | <b>36.95 ± 0.07</b>      | <b>36.89 ± 0.11</b>      |
| $\Delta E_{QM}^{2-}(B)_b$ | <b>40.59 ± 0.11</b>      | <b>41.46 ± 0.13</b>      | <b>40.77 ± 0.10</b>      | <b>40.19 ± 0.14</b>      |

<sup>a</sup> At optimized anionic structures. <sup>b</sup> At optimized dianionic structures.

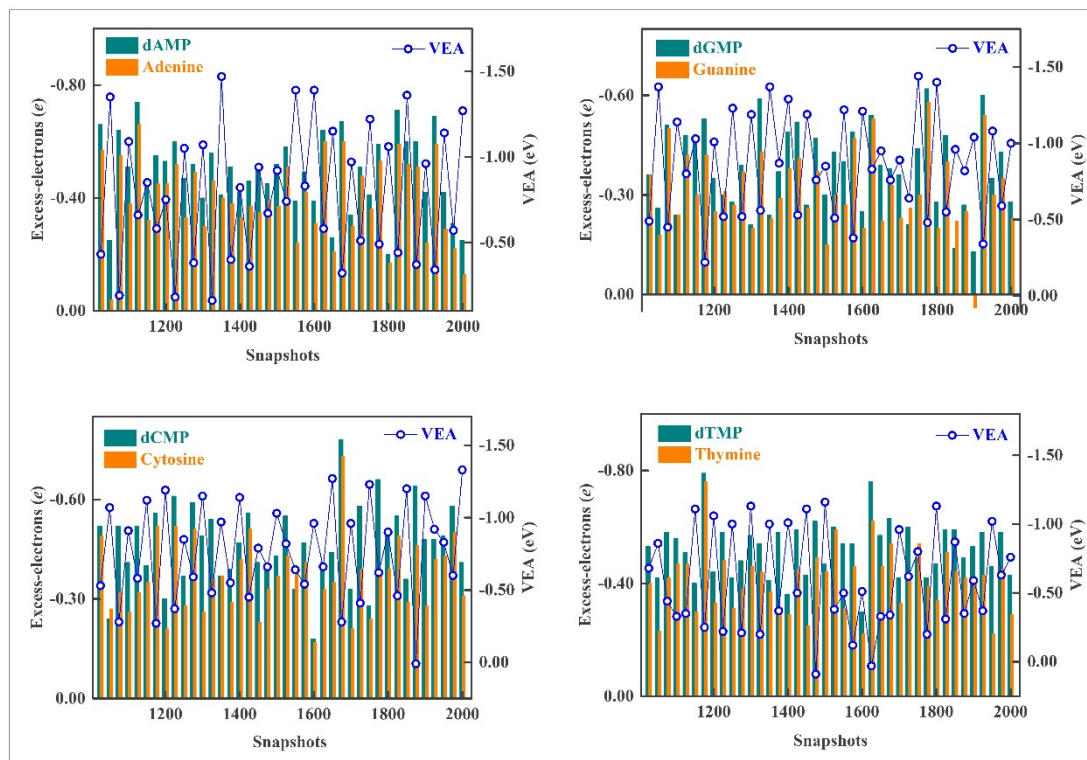

Figure S1. Excess-electron distributions in vertical excess-electron attachment to aqueous dRT<sup>-</sup> and QM/MM VEAs for 40 snapshots.

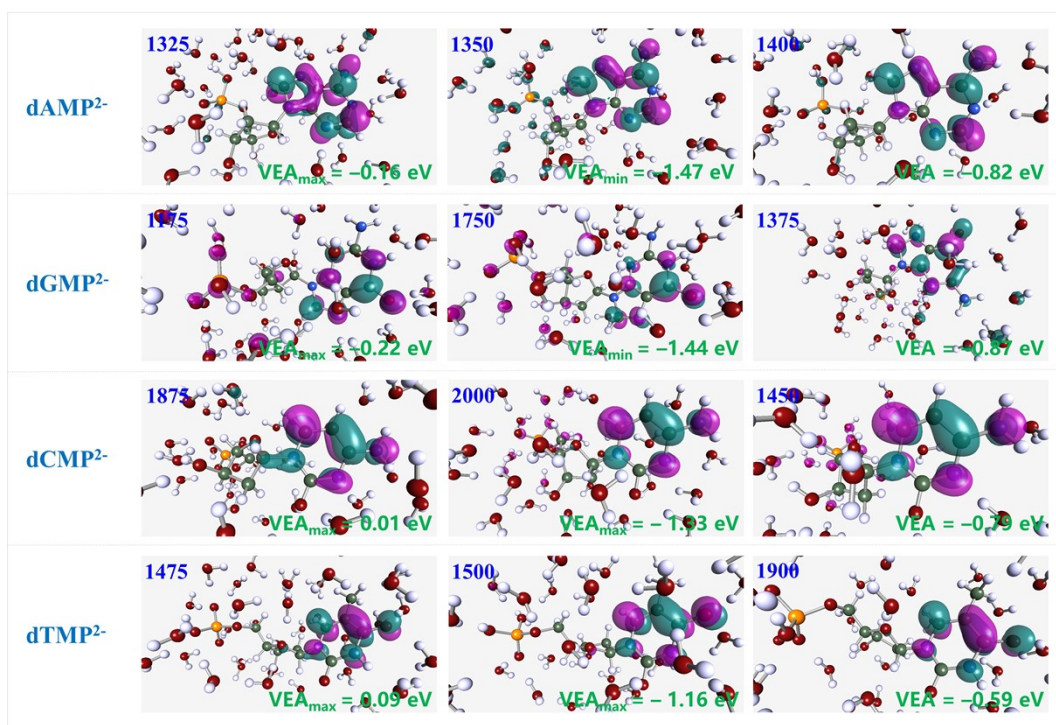

Figure S2. SOMOs of pol-QM calculation for representative snapshots at optimized anionic structures.

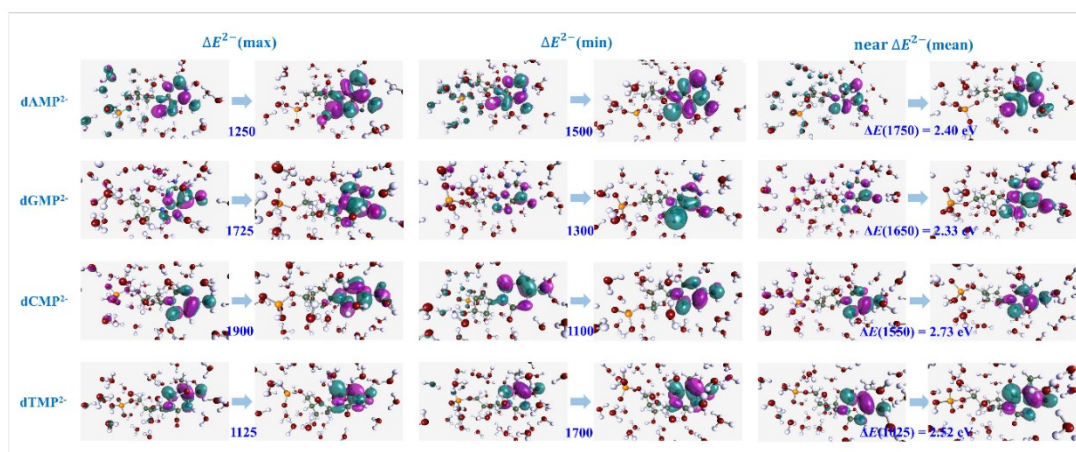

Figure S3. dRT<sup>2-</sup> SOMOs of pol-QM calculations at optimized structures of anions and dianions for representative snapshots.
